# Supplementary material
Source: PubMed Central journal article supplement (PMC3471681)
Supplement: supp_M112.369595_supplementary_Figure_2.pdf [file supp_M112.369595_supplementary_Figure_2.pdf]

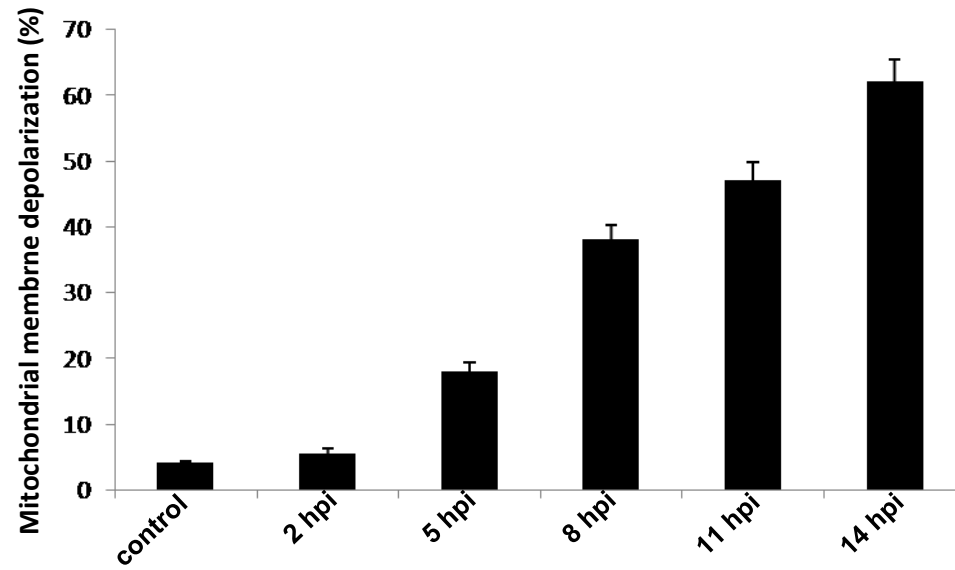

MA104 cells were infected with A5-16 (2 m.o.i) and the amount of mitochondrial depolarization was measured by flow cytometry using TMRE (100nM) as described previously. Histogram revealed depolarization from 5hpi with an increase till 14 hpi similar SA11.
