# Supplementary material
Source: PubMed Central journal article supplement (PMC3471681)
Supplement: supp_M112.369595_supplementary_Figure_3.pdf [file supp_M112.369595_supplementary_Figure_3.pdf]

A

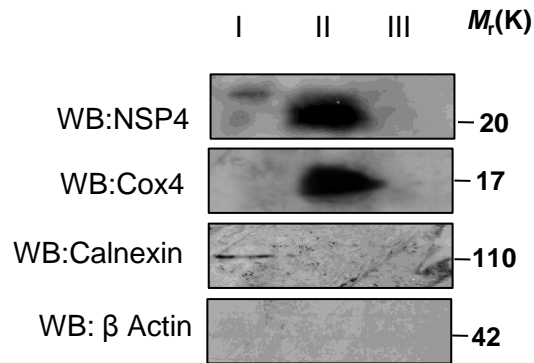

B

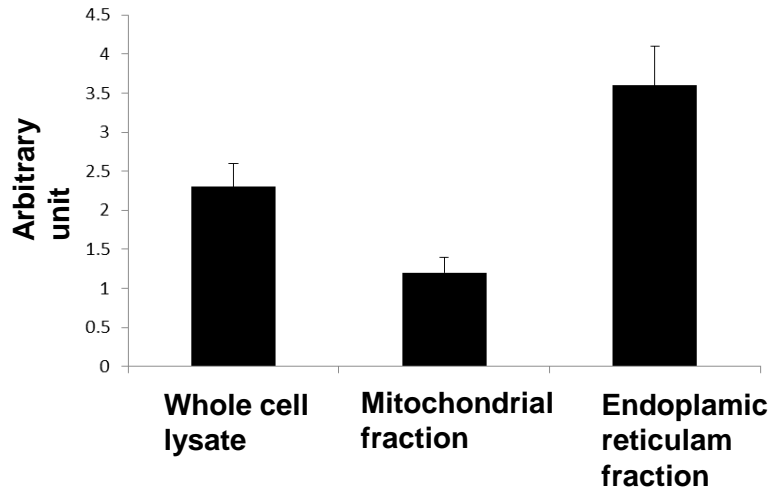

C

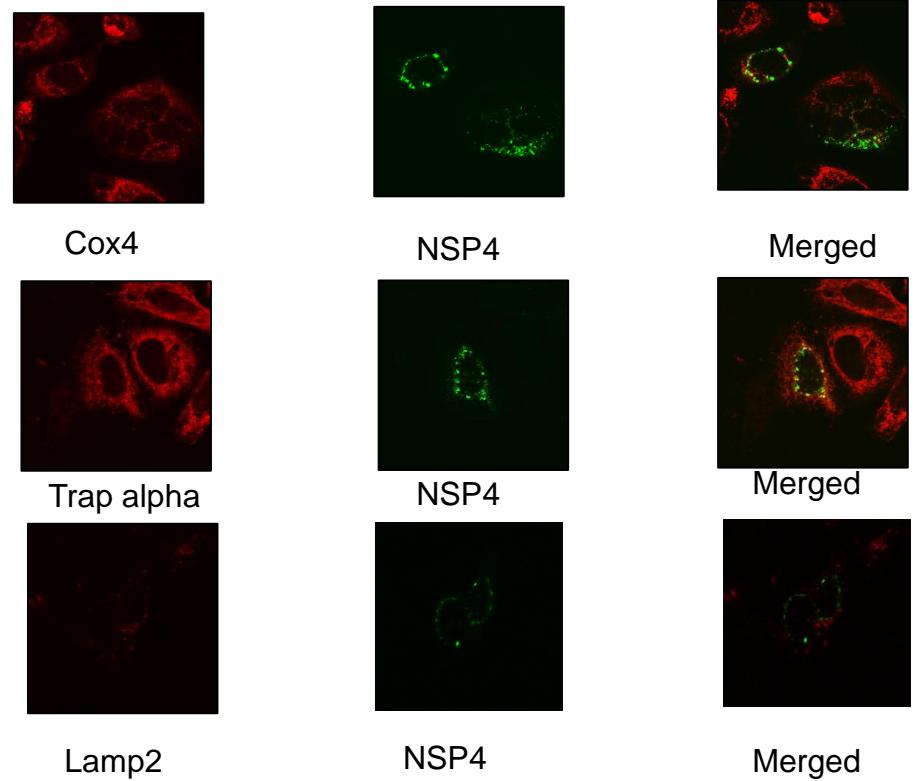

- (A) MA104 cells were infected with SA11 (2 moi) for 8 hpi and the mitochondrial fraction and contaminating endoplasmic reticulum fraction were separated by ultracentrifugation using iodixanol (20). Western blots of equal proportions of all the three interfaces in the iodixanol column produced after ultracentrifugation revealed small amount of endoplasmic reticulum contamination which contain very small amount of NSP4 present in interface I, which has higher molecular weight and the purified mitochondrial fraction contain large amount of NSP4 (20 KD) which is present in interface II. Cox 4 was used as mitochondrial marker and calnexin was used as endoplasmic reticulum marker.  $\beta$  Actin was used as cytoplasmic marker.
- (B) MA104 cells were infected with SA11 (2 moi) for 8 hpi and the mitochondrial fraction and endoplasmic reticulum fraction were separated by ultracentrifugation using sucrose gradient (21) followed by western blot analysis and densitometric analysis of same amount of protein from whole cell lysate, mitochondrial fraction, endoplasmic reticulum fraction.
- (C) Subcellular localization of NSP4 using confocal microscopy as described in materials and methods.
